# Supplementary material
Source: Copernicus journal article supplement (doi:10.5194/egusphere-2026-3032)
Supplement: Supplementary file 1 [file egusphere-2026-3032-supplement.pdf]

1 **Supplementary to:**

2 **Insights into the chemical and physical drivers of surface ozone in the Trans-Himalaya**

3 Imran A. Girach<sup>1,\*</sup>, Mehul R. Pandya<sup>1</sup>, Tabish Ansari<sup>2</sup>, Sonam Angmo<sup>3</sup>, Subrat Sharma<sup>4,5</sup>, Bipasha Paul  
4 Shukla<sup>1</sup>, Aditya Vaishya<sup>6,7</sup>, Lokesh Kumar Sahu<sup>8</sup>, Tim Butler<sup>2</sup>, Narendra Ojha<sup>8</sup>

5 <sup>1</sup>Space Applications Centre, Indian Space Research Organisation, Ahmedabad 380015, India

6 <sup>2</sup>Research Institute for Sustainability - Helmholtz Centre Potsdam (RIFS), Potsdam, 14467, Germany

7 <sup>3</sup>University of Ladakh, Leh, Ladakh 194101, India

8 <sup>4</sup>Formerly at University of Ladakh, Leh, Ladakh 194101, India

9 <sup>5</sup>Rashtriya Raksha University, Leh, Ladakh 194101, India

10 <sup>6</sup>School of Arts and Sciences, Ahmedabad University, Ahmedabad, 380009, India

11 <sup>7</sup>The Climate Institute, Ahmedabad University, Ahmedabad, 380009, India

12 <sup>8</sup>Physical Research Laboratory, Ahmedabad, 380009, India

13 \*Correspondence: Imran A. Girach ([imran.girach@gmail.com](mailto:imran.girach@gmail.com)) and Sonam Angmo  
14 ([sonaman36@gmail.com](mailto:sonaman36@gmail.com))

15

16 Text S1: Formulae of O<sub>3</sub> exposure indices

17 MDA8 (μg m<sup>-3</sup>) =  $\max(\frac{1}{8} \sum_{j=i}^{i+7} [O_3]_j)$  where,  $j=0, 1, \dots, 23$  h

18 M7 (ppbv) =  $\frac{1}{n} \sum_i^n [O_3]_i$ , for 09:00–15:59 h

19 AOT40 (ppm h) =  $\sum_i^n ([O_3]_i - 40) \times \Delta t$ , if  $[O_3]_i \geq 0.04$  ppmv for 07:00–17:59 h ( $\Delta t=1$  h as  
20 hourly averaged O<sub>3</sub> is used)

21 SUM06 (ppm h) =  $\sum_i^n [O_3]_i \times \Delta t$ , if  $[O_3]_i \geq 0.06$  ppmv for 07:00–17:59 h ( $\Delta t=1$  h as hourly  
22 averaged O<sub>3</sub> is used)

23 W126 (ppm h) =  $\sum_i^n \left( \frac{[O_3]_i}{1+4403 \exp(-0.126 \times [O_3]_i)} \right) \times \Delta t$ , if  $[O_3]_i > 0$  ppmv for 07:00–17:59 h  
24 ( $\Delta t=1$  h as hourly averaged O<sub>3</sub> is used)

25 OSDMA8 = Annual maximum of 6-month running mean of MDA8

26

27

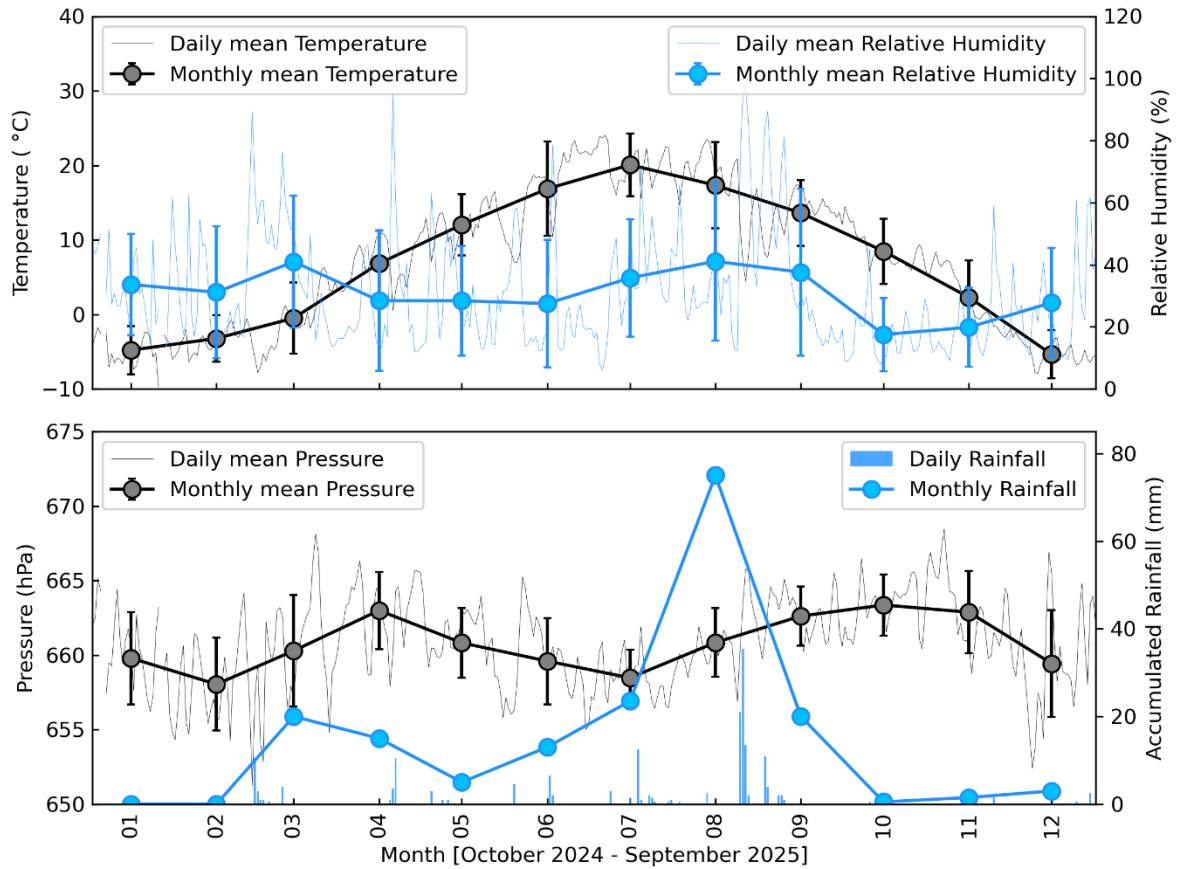

28

29 Figure S1: Temporal variation of meteorological parameters (daily and monthly) at Leh town over  
 30 the study period.

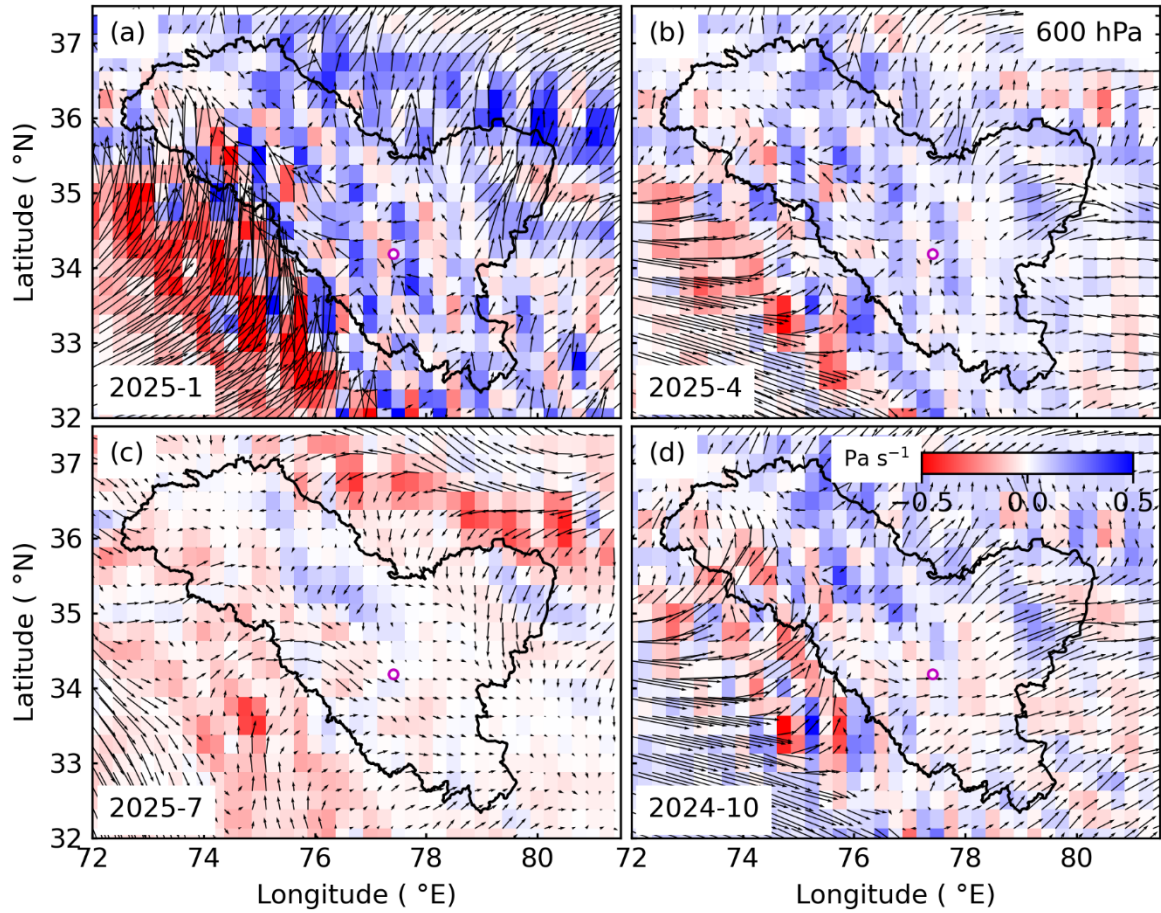

31

32 Figure S2: Synoptic winds at 600 hPa for different months representing different seasons. Magenta  
 33 circle depicts the study site. Background colour map shows vertical wind ( $\text{Pa s}^{-1}$ ).

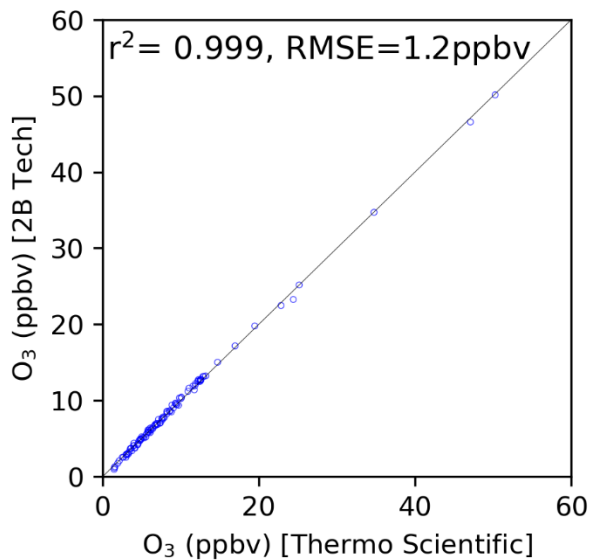

34

35 Figure S3: Comparison of  $\text{O}_3$  measured from 2B Tech and Thermo Scientific analyser operated  
 36 through single inlet in ambient conditions.

37

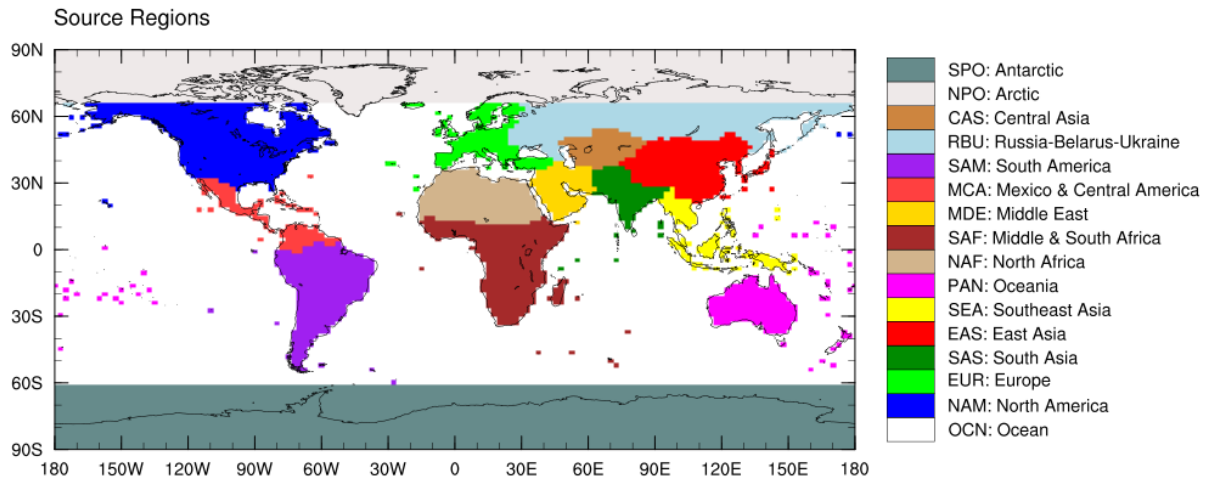

38

39 Figure S4: Different source regions as defined for the CAM4-Chem simulations.

40

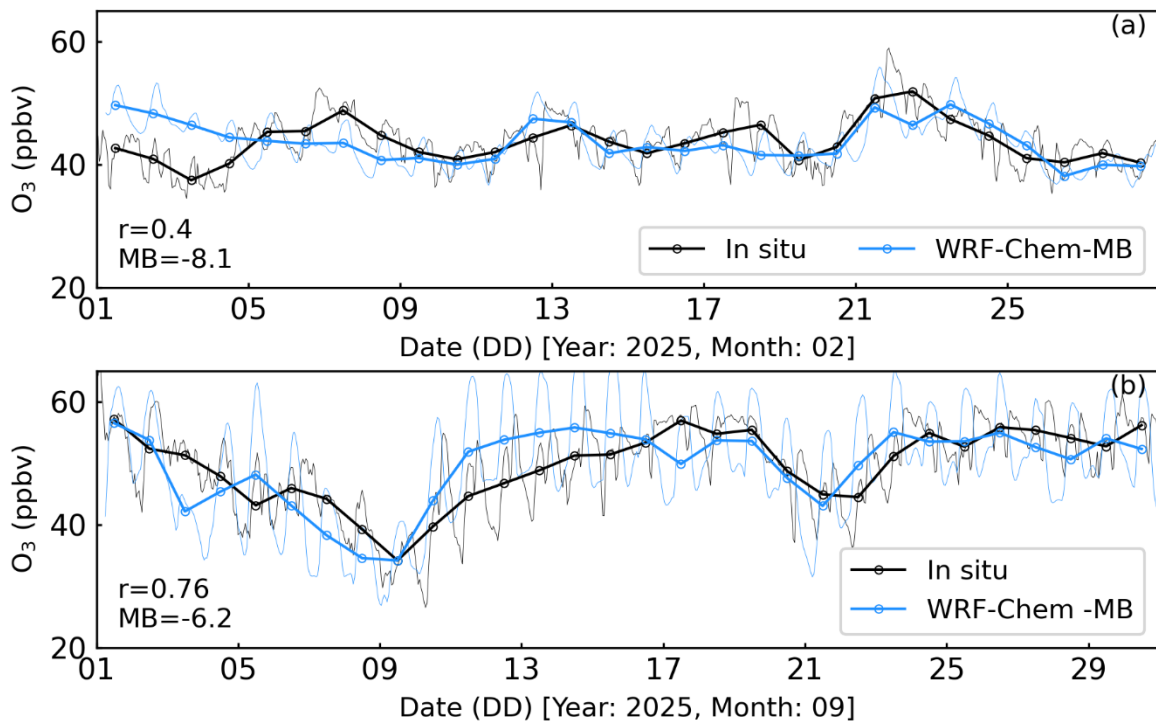

41

42 Figure S5: Comparison of WRF-Chem simulated O<sub>3</sub> with the measurements over the study region.  
 43 While thin lines represent hourly values, thick lines with scatter represent daily mean. Correlation  
 44 coefficient,  $r$  and mean bias (MB) are corresponding to daily mean.

45

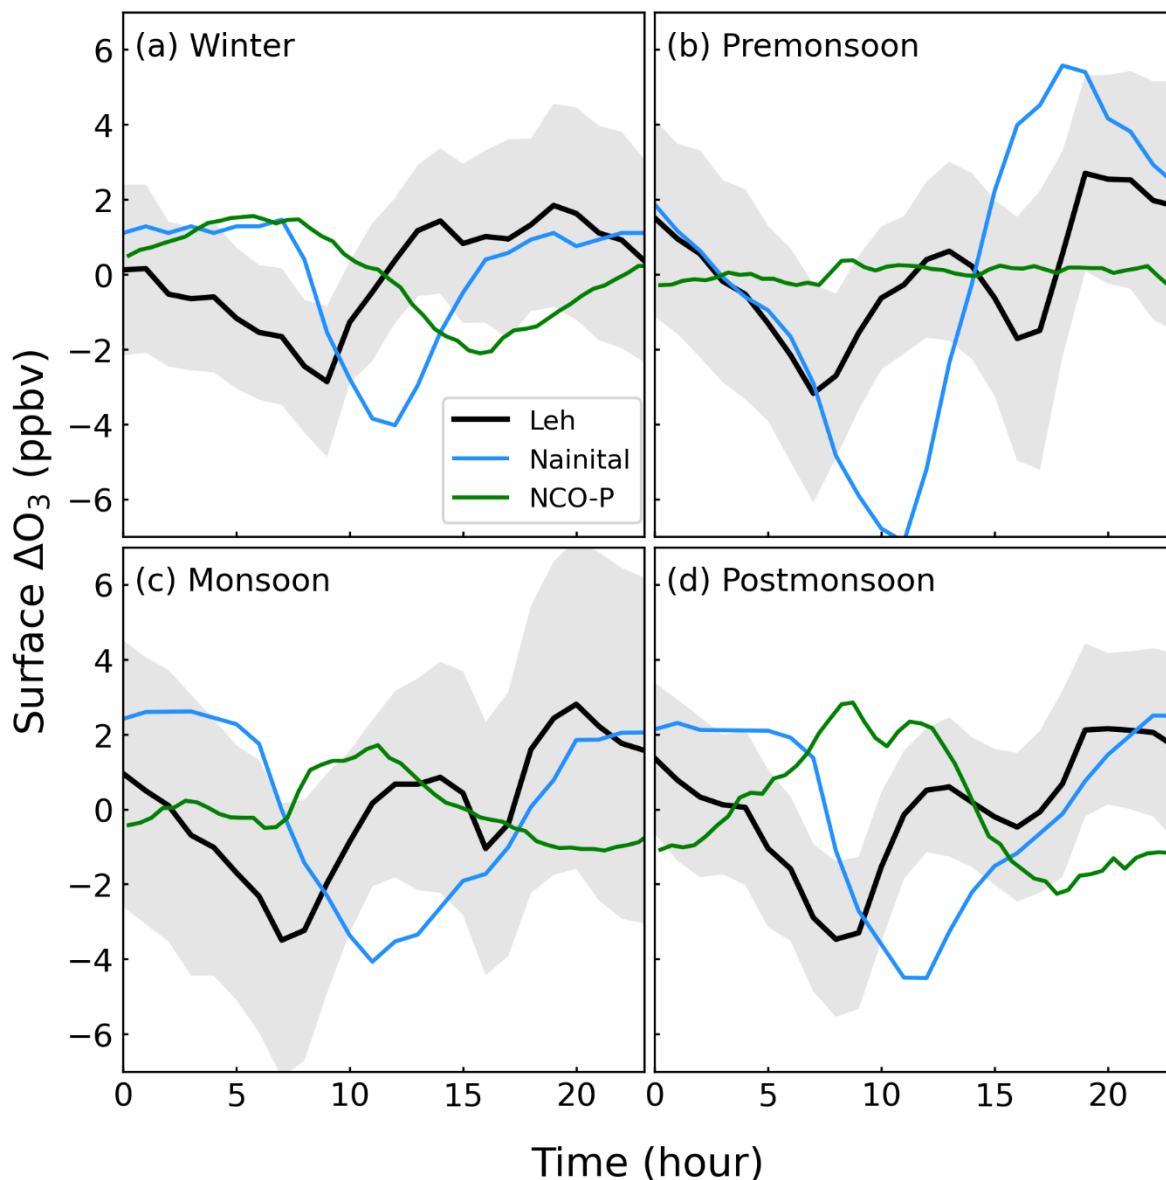

46

47 Figure S6: Mean diurnal pattern of  $\Delta O_3$  at the study site (black) for different seasons: Winter (DJF—  
 48 December-January-February), premonsoon (MAM—March-April-May), monsoon (JJAS—June-July-  
 49 August-September), postmonsoon (ON—October-November). The shaded region represents  
 50 standard deviation. Diurnal variations observed at cleaner high-altitude sites, Nainital (1.9 km amsl)  
 51 and NCO-P (5 km amsl), are also shown (Sarangi et al., 2014; Cristofanelli et al., 2010). Post-noon  
 52 enhancement seen at Nainital during premonsoon season could be due to the influence of transport  
 53 from an elevated regional boundary layer over nearby IGP (Indo Gangetic Plain) region.

54

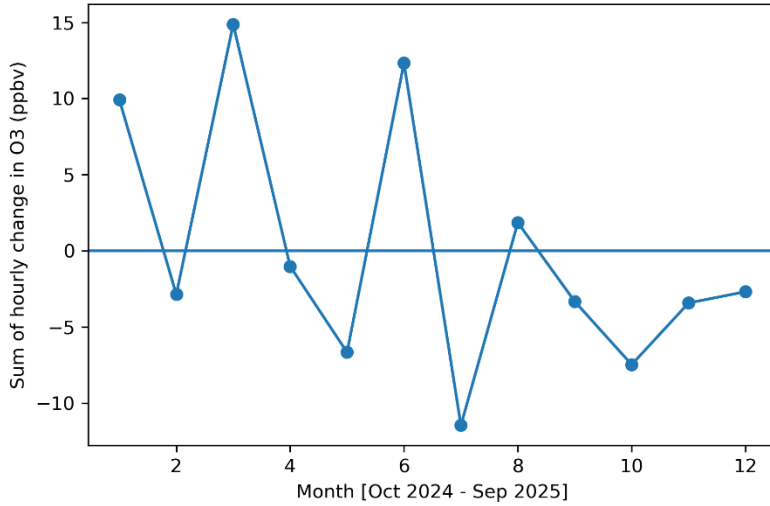

55

56 Figure S7: Sum of hourly change in observed O<sub>3</sub> over the study region.

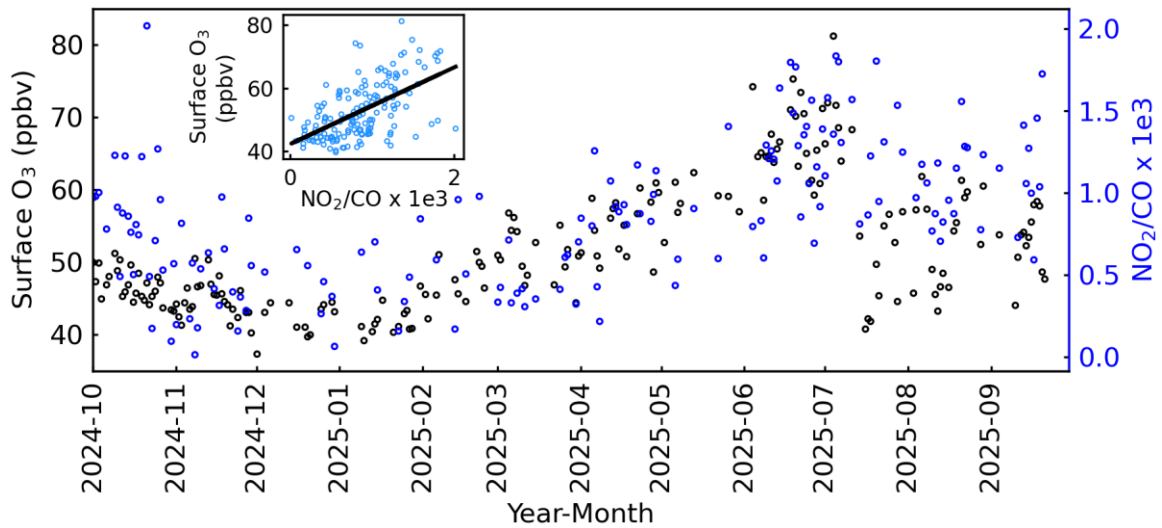

57

58 Figure S8: Variations of surface O<sub>3</sub> and ratio of NO<sub>2</sub>/CO from TROPOMI over the study region. Inset  
59 shows the linear association of O<sub>3</sub> with NO<sub>2</sub>/CO.

60

61

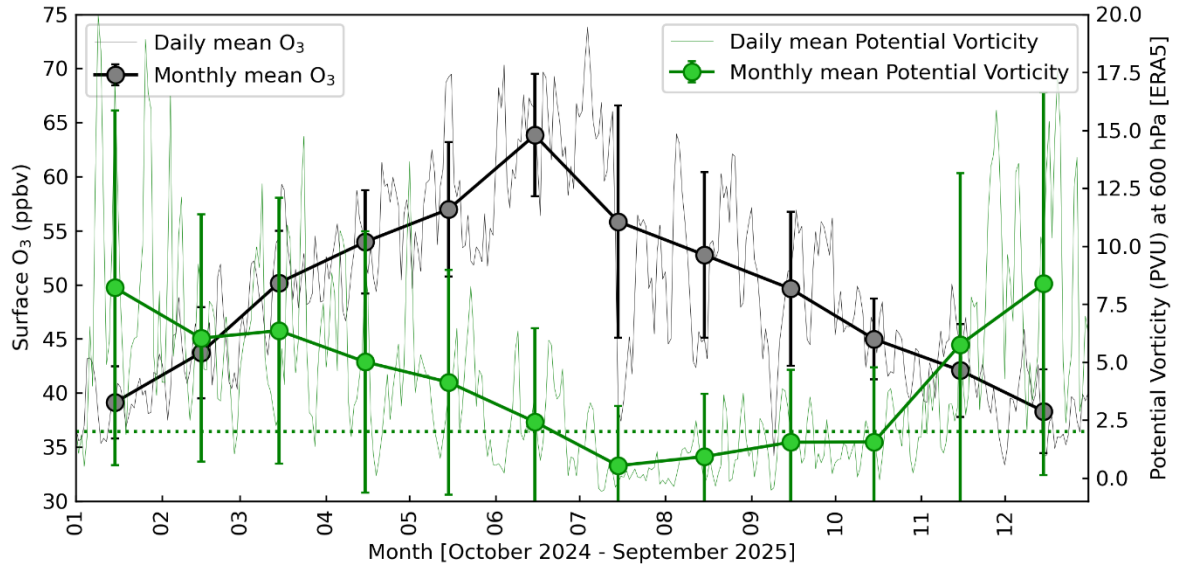

62

63 Figure S9: Variations of surface O<sub>3</sub> and potential vorticity (PVU = 10<sup>-6</sup> K kg<sup>-1</sup> m<sup>2</sup> s<sup>-1</sup>) at 600 hPa at  
 64 study site. The dotted green line suggest 2 PVU, above which air is considered to be stratospheric.

65

66

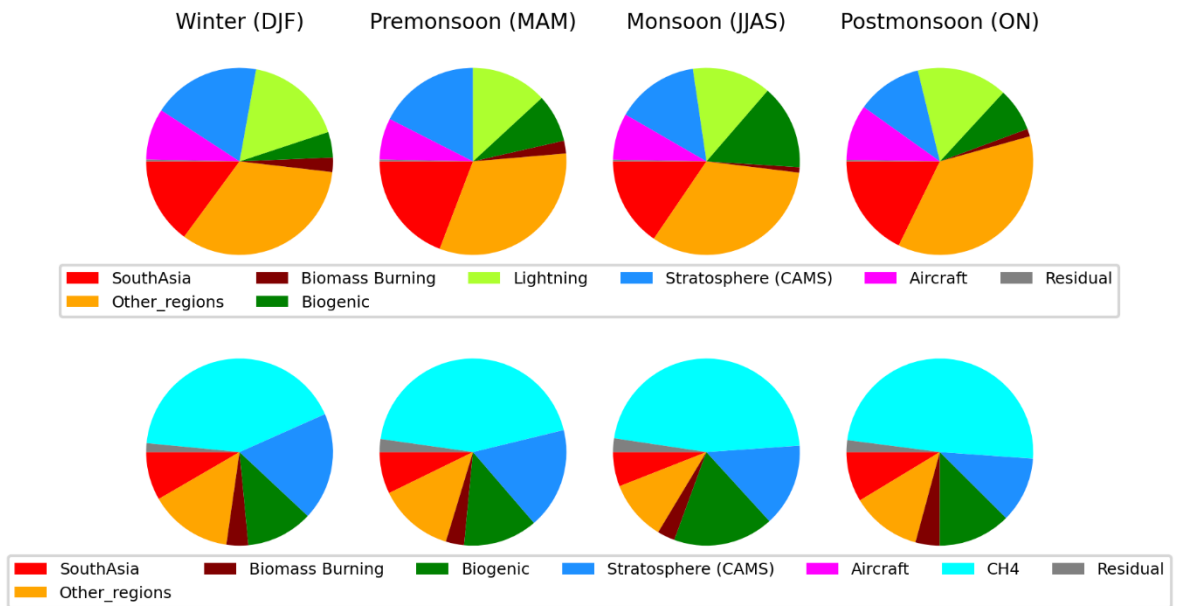

67

68 Figure S10: Contribution of various sources to surface O<sub>3</sub> over the study region based on NO<sub>x</sub> (top  
 69 panel) and VOC (bottom panel) tagging in the CAM4-Chem model simulations.

70

71

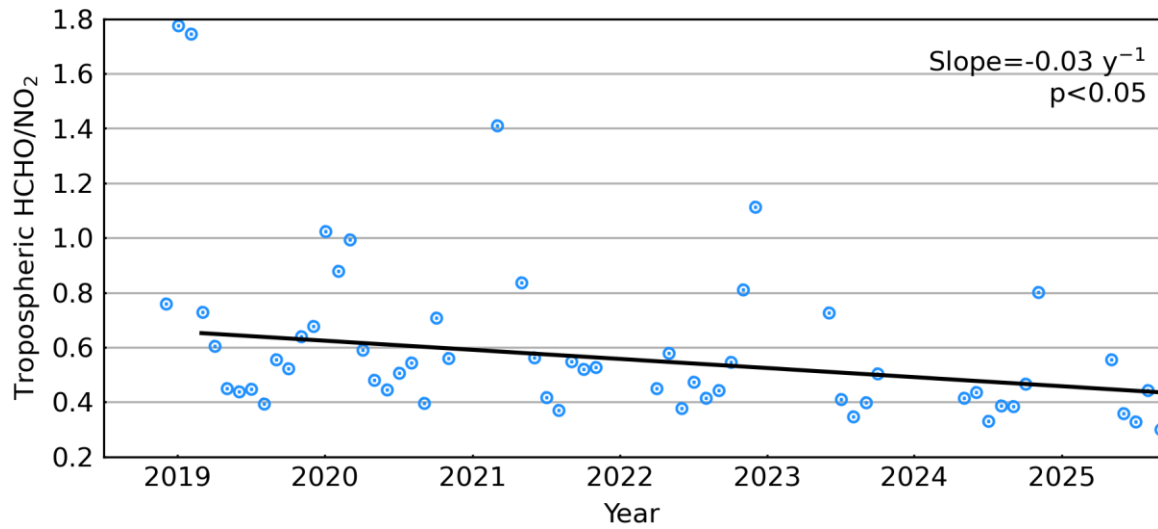

72

73 Figure S11: Monthly mean ratio of tropospheric HCHO/NO<sub>2</sub> over Leh region (77.41°–77.70° E;  
 74 34.08°–34.23° N) during 2018–2025. Note that the initial three points are excluded in the linear fit  
 75 (black line) as two of them appear to be outliers with very high values of 1.7–1.8.

76

77

78 Table S1: Monthly mean O<sub>3</sub> along with standard deviation observed at Leh.

| Month    | Mean O <sub>3</sub> | Standard deviation |
|----------|---------------------|--------------------|
| Oct-2024 | 45                  | 3.7                |
| Nov-2024 | 42.1                | 4.3                |
| Dec-2024 | 38.3                | 3.9                |
| Jan-2025 | 39.1                | 3.3                |
| Feb-2025 | 43.7                | 4.2                |
| Mar-2025 | 50.2                | 4.8                |
| Apr-2025 | 54                  | 4.8                |
| May-2025 | 57                  | 6.2                |
| Jun-2025 | 63.8                | 5.7                |
| Jul-2025 | 55.8                | 10.7               |
| Aug-2025 | 52.8                | 7.6                |
| Sep-2025 | 49.6                | 7.1                |

79
